# Supplementary material
Source: publisher figshare collection journal article supplement (https://tandf.figshare.com/ndownloader/files/20284725)
Supplement: Supplementary file 1 [file 20284725]

The other 8 theoretical model with corresponding population parameters of simulation one are placed as follows:


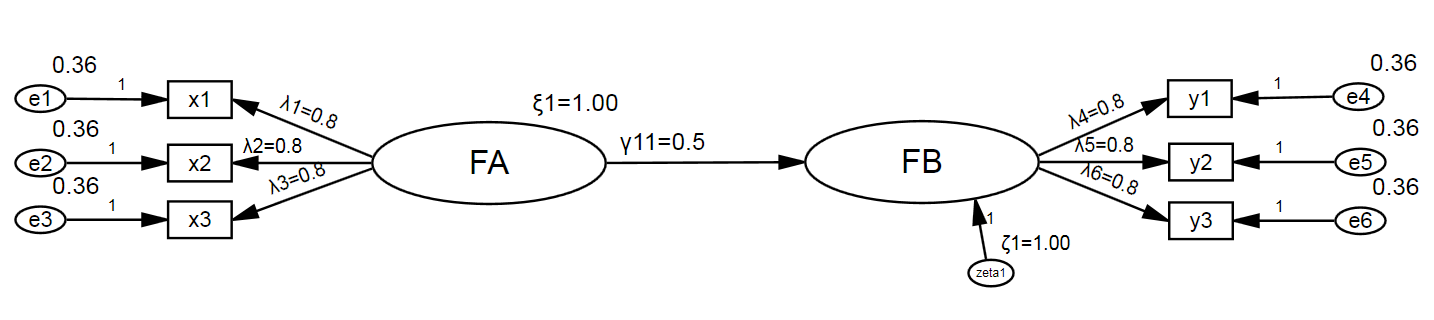


|  |
| --- |

**Figure S1** **| The SEM model with 2 factors and 3 indicators per factor, as well as the population parameters**. FA is exogenous latent variable (factor); FB is endogenous latent variable (factor); x1-x3 and y1-y3 are the x and y indicators, respectively; e1-e6 are error terms of the indicators.


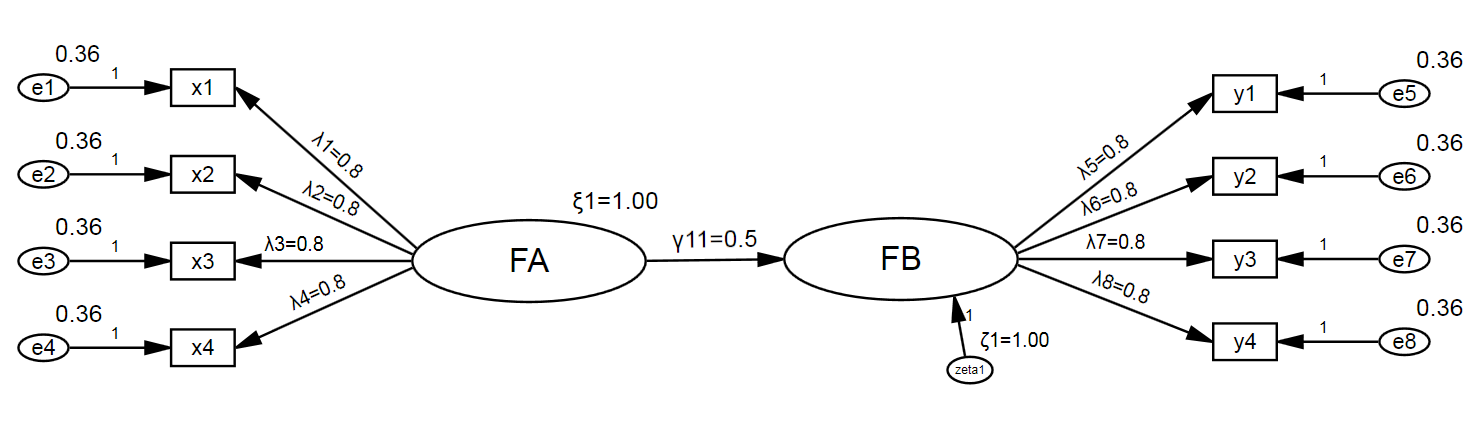


|  |
| --- |

**Figure S2** **| The SEM model with 2 factors and 4 indicators per factor, as well as the population parameters**. FA is exogenous latent variable (factor); FB is endogenous latent variable (factor); x1-x4 and y1-y4 are the x and y indicators, respectively; e1-e8 are error terms of the indicators.


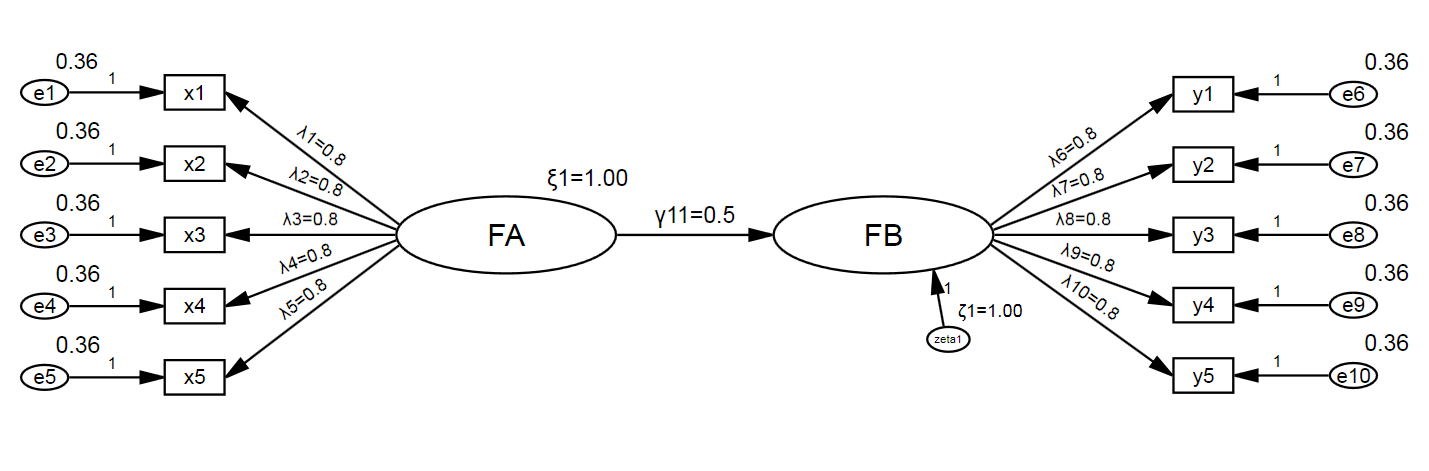


|  |
| --- |

**Figure S3** **| The SEM model with 2 factors and 5 indicators per factor, as well as the population parameters**. FA is exogenous latent variable (factor); FB is endogenous latent variable (factor); x1-x5 and y1-y5 are the x and y indicators, respectively; e1-e10 are error terms of the indicators.


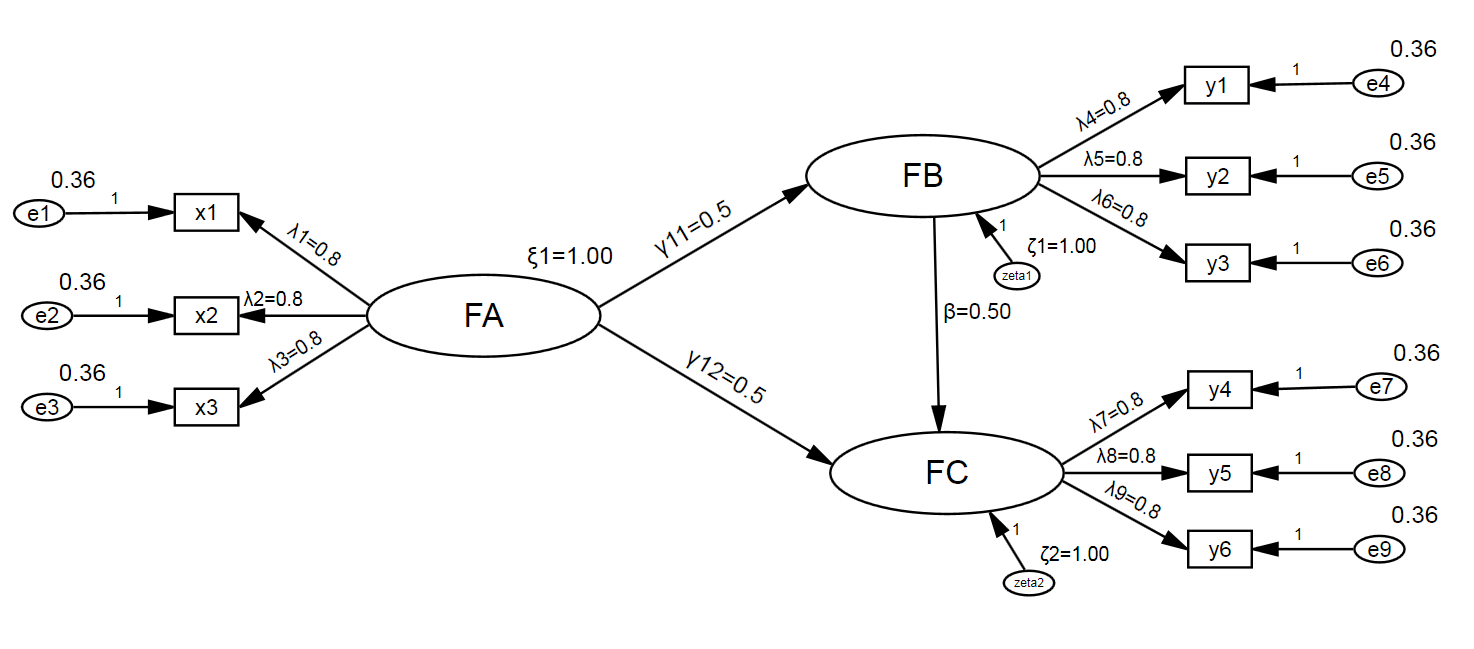


|  |
| --- |

**Figure S4** **| The SEM model with 3 factors and 3 indicators per factor, as well as the population parameters**. FA is exogenous latent variable (factor); FB and FC are endogenous latent variables (factors); x1-x3 and y1-y6 are the x and y indicators, respectively; e1-e9 are error terms of the indicators.


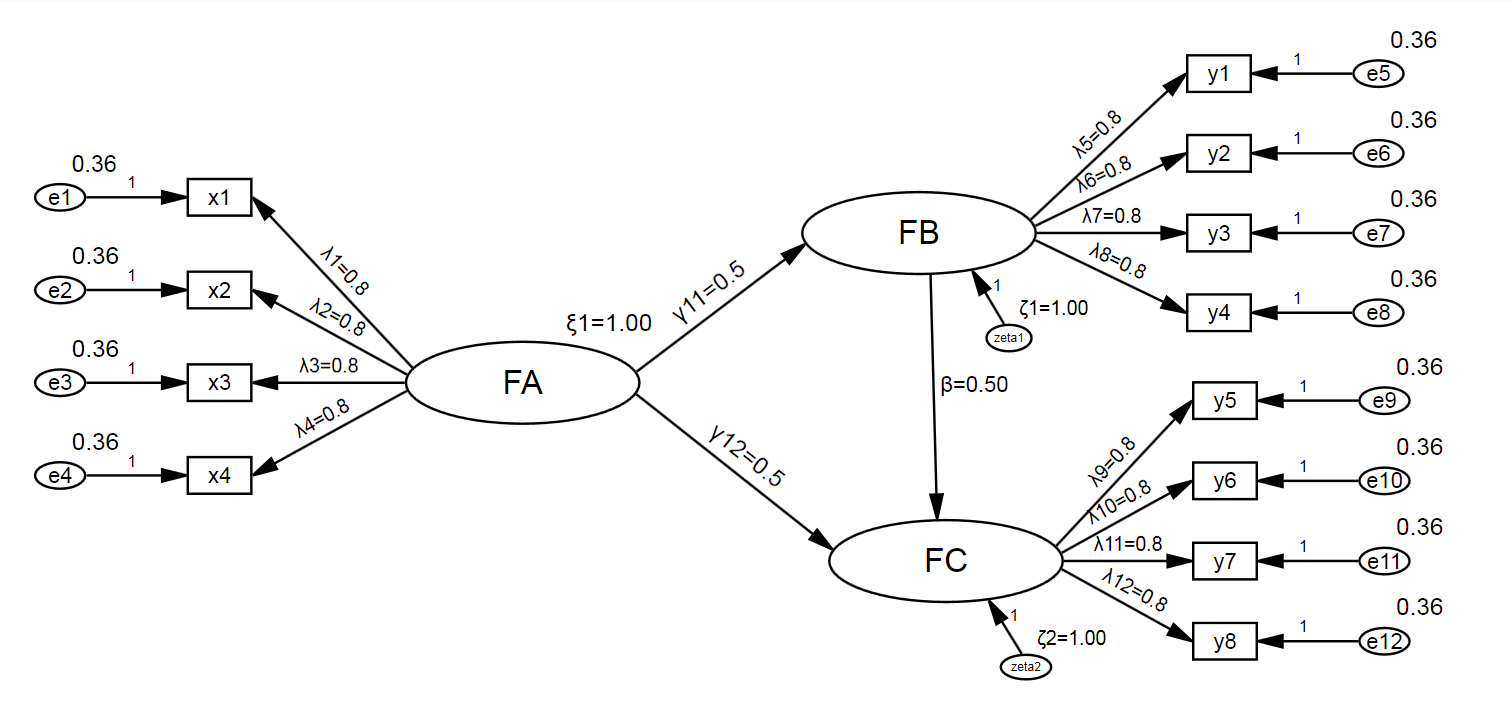


|  |
| --- |

**Figure S5** **| The SEM model with 3 factors and 4 indicators per factor, as well as the population parameters**. FA is exogenous latent variable (factor); FB and FC are endogenous latent variables (factors); x1-x4 and y1-y8 are the x and y indicators, respectively; e1-e12 are error terms of the indicators.


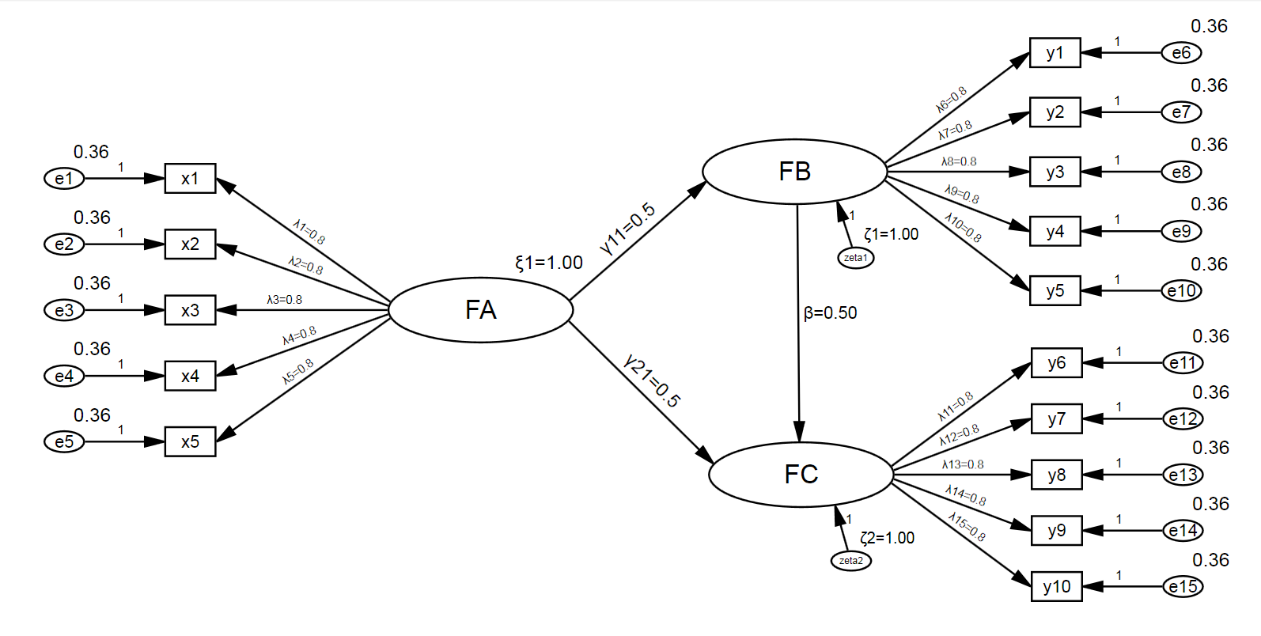


|  |
| --- |

**Figure S6** **| The SEM model with 3 factors and 5 indicators per factor, as well as the population parameters**. FA is exogenous latent variable (factor); FB and FC are endogenous latent variables (factors); x1-x5 and y1-y10 are the x and y indicators, respectively; e1-e15 are error terms of the indicators.


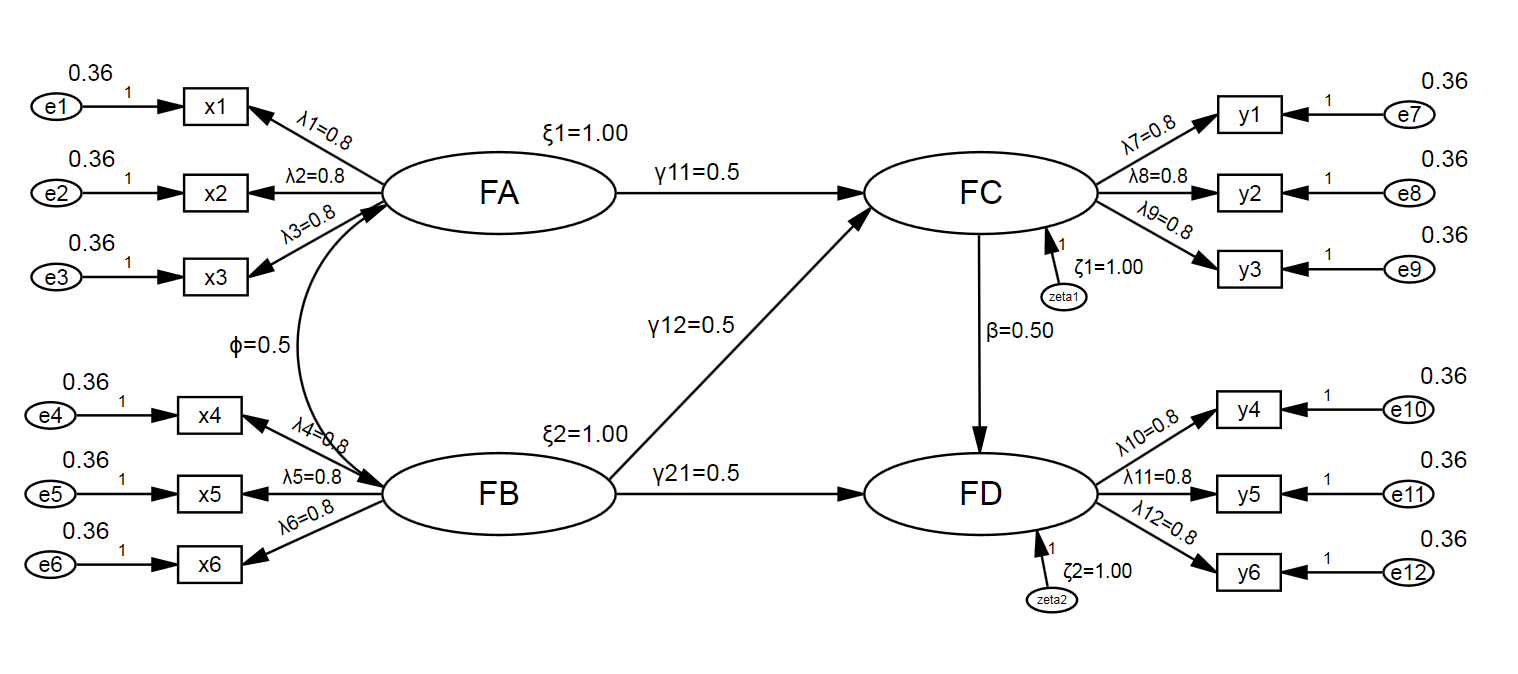


|  |
| --- |

**Figure S7** **| The SEM model with 4 factors and 3 indicators per factor, as well as the population parameters**. FA and FB are exogenous latent variables (factors); FC and FD are endogenous latent variables (factors); x1-x6 and y1-y6 are the x and y indicators, respectively; e1-e12 are error terms of the indicators.


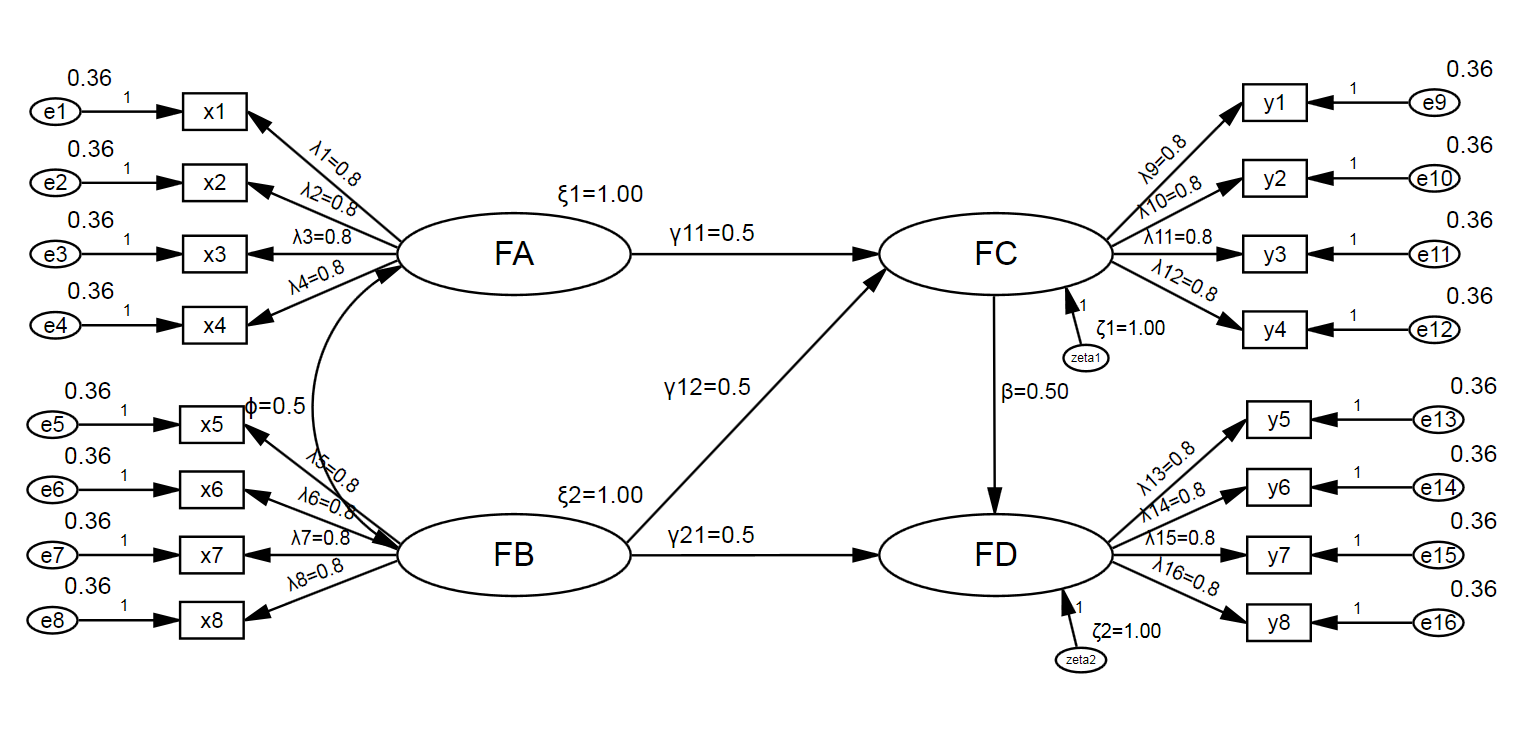


|  |
| --- |

**Figure S8** **| The SEM model with 4 factors and 4 indicators per factor, as well as the population parameters**. FA and FB are exogenous latent variables (factors); FC and FD are endogenous latent variables (factors); x1-x8 and y1-y8 are the x and y indicators, respectively; e1-e16 are error terms of the indicators.
